# Supplementary material for: Tea consumption and the risk of biliary tract cancer: a systematic review and dose–response meta-analysis of observational studies
Source: PubMed Central journal article supplement (PMC5503640; doi:10.18632/oncotarget.16963), 2017-04-08
Supplement: oncotarget-08-39649-s001.pdf [file oncotarget-08-39649-s001.pdf]

# Tea consumption and the risk of biliary tract cancer: a systematic review and dose–response meta-analysis of observational studies

## Supplementary Materials

**Supplementary Table 1: Scores of the Newcastle-Ottawa scale for case control studies**

| Study/Years of Publication | Fully defined cases | Representative cases | Selection of controls | Definition of controls | Controlling the important factors or confounding factors | Determination of exposure | Same method of determination for cases and control | Non-response rate | Total score |
|----------------------------|---------------------|----------------------|-----------------------|------------------------|----------------------------------------------------------|---------------------------|----------------------------------------------------|-------------------|-------------|
| La Vecchia C.1992          | *                   | *                    |                       | *                      | **                                                       |                           | *                                                  |                   | 6           |
| Zatonski .1992             | *                   | *                    | *                     |                        | **                                                       | *                         | *                                                  |                   | 7           |
| Xue-Hong Zhang.2006        | *                   | *                    |                       | *                      | **                                                       | *                         | *                                                  | *                 | 8           |
| Wong-Ho Chow.1994          | *                   | *                    | *                     |                        | **                                                       |                           | *                                                  | *                 | 7           |
| STELLA YEN.1987            | *                   | *                    | *                     |                        | **                                                       |                           | *                                                  |                   | 6           |

**Supplementary Table 2: Scores of the Newcastle-Ottawa scale for cohort studies**

| Study/Years of Publication | representativeness of exposed cohort | Selection of the non-exposed cohort | Determination of exposure | outcome not present at study start | Controlling the important factors or confounding factors. | Assessment of outcome | Follow-up long enough for outcome to occur | Integrity of follow up | Total score |
|----------------------------|--------------------------------------|-------------------------------------|---------------------------|------------------------------------|-----------------------------------------------------------|-----------------------|--------------------------------------------|------------------------|-------------|
| Jun.2001                   | *                                    | *                                   | *                         | *                                  | *                                                         | *                     |                                            | *                      | 7           |
| Sarah Nechuta .2012        | *                                    | *                                   | *                         | *                                  | **                                                        | *                     | *                                          | *                      | 9           |
| Takeshi.2016               | *                                    | *                                   | *                         | *                                  | **                                                        | *                     |                                            | *                      | 8           |

**Supplementary Table 3: The main characteristics of the included studies. See Supplementary\_Table\_3**
